# Supplementary material for: Proline, Total Antioxidant Capacity, and OsP5CS Gene Activity in Radical and Plumule of Rice are Efficient Drought Tolerance Indicator Traits
Source: Hindawi journal article supplement (doi:10.1155/2020/8862792), 2020-12-22
Supplement: f1 [file 8862792.f1.docx]

**Proline, total antioxidant capacity and *OsP5CS* gene activity in radical and plumule of rice are efficient drought tolerance indicator traits**

**Supplementary material**

**Plant material and growing conditions**

The 606 genotypes were gathered from International Rice Research Institute (IRRI), Philippines, National Agriculture Research Centre (NARC) Islamabad, Pakistan, and Rice Research Institute (RRI) Kala Shah Kaku, Pakistan. One seed of each genotype was sown in experimental pots each holding 450 grams of soil + sand in one to one ratio. Two treatment combinations were maintained. Up to 150 ml water (100% field capacity, determined by the gravitational method) was applied in control and 60 ml (40% field capacity, determined by the gravitational method) in drought pots. Water was maintained each day by determining the evaporation loss in nine reference pots placed at a certain location in this experiment. Evaporation loss = average weight of the reference pots after water application – average weight of the reference pots next day before water application. Data were recorded after 30 days of sowing. Genotypes were evaluated based on morphological traits including, root length (RL), shoot length (SL), fresh root weight (FRW), fresh shoot weight (FSW), dry root weight (DRW) and dry shoot weight (DSW). This experiment was performed following the factorial under complete randomized design with two replications. Each replication had one plant per pot.

To confirm the effectiveness of the screening of 606 rice genotypes, the 20 selected genotypes were again evaluated at the seedling stage and also tested at the maturity stages. To test at the seedling stage (four-leaf stage) the experiment was maintained and evaluated as described above for the screening of 606 genotypes. It was completed with three replications.

To test the genotypic response at the maturity stage (grain filling time), seeds were sown in pots each holding eight kg of soil. The experiment was conducted following the factorial under complete randomized design, two treatment combinations each with three replications was maintained. Until tillering 1500 ml water was applied every day in both control and stressed pots. After 40 days of sowing 1500 ml water was daily applied in control experimental pots while in drought pots 1500 ml water was applied after every fourth day. The genotypes were evaluated based on the drought-induced change in plant total biomass (PTB), fertile florets (FF), sterile florets (SF), 100-grain weight (100-GW) and the number of tillers (Ti).

**Statistical analysis**

To test the significant difference among genotypes, analysis of variance (ANOVA) was performed (Statistix 8, version 8.1). Biplot analysis was done to find the response of these genotypes against control and stressed environments (Yan et al, 2001).

**Results of the germplasm screening**

Many genotypes were able to grow healthy seedling under drought stress. Significant variation was recorded for their RL, SL, FRW, FSW, DRW and DSW (p≤ 0.01, Table S1). Biplot analysis for the gain in RL, SL, FRW, FSW, DRW and DSW under control and drought stress has classified the genotypes into three groups (Figure S1). Group one included highly tolerant genotypes (circle 1), the location of these genotypes is showing that their performance was better under both control and drought environments as their OP length was more than genotypes present in circle two and three. Group two was containing moderately drought tolerant genotypes (circle 2) as these have less OP length compared to the genotypes in group one. Genotypes present in group three comprised susceptible genotypes (circle 3) as these were opposite to the trait vectors and their OP was negative so considered as drought susceptible.

At the **seedling stage,** the performance of the 20 drought responsive genotypes was similar to the screening performed for 606 accessions. RL, SL, FRW, FSW, DRW and DSW were significantly decreased under drought stress (p≤ 0.01, Table S3). Biplot analysis classified the genotypes into DT, MDT and DS groups (Figure S2a). Drought tolerant genotypes performed better under both control and drought environments as their OP length was more than MDT and DS genotypes. The MDT genotypes have less OP length compared to the DS. The DS genotypes were opposite to the trait vectors and their OP was negative so considered DS.

At **maturity stage,** the FF, Ti, PTB and 100-GW were significantly decreased under drought stress (p≤ 0.01, Table S4). Same genotypes were again appeared as DT, MDT and DS. The tolerant genotypes had the longer OP and these were closer to the mentioned trait vectors. The MDT genotypes had less OP value than DT genotypes but more than susceptible genotypes. The MDT genotypes were close to the trait vectors their closeness to vectors was less as compared to DT genotypes but more than DS. The DS genotypes were opposite to the trait vectors. That is indicating, their OP was negative and these genotypes could not perform better under drought stress (Figure S2b).

**Table S1**. **Mean square of absolute values for various seedling traits of 606 rice genotypes grown in control and drought stress**

| Source of Variation | DF | FRW | FSW | DRW | DSW | RL | SL |
| --- | --- | --- | --- | --- | --- | --- | --- |
| Genotypes | 605 | 0.057** | 0.13** | 0.0059** | 0.0038** | 186** | 67** |
| Treatment | 1 | 487** | 1688** | 4.5** | 38** | 29200** | 35375** |
| Genotypes × Treatment | 605 | 0.014** | 0.057** | 0.00037** | 0.0015** | 29** | 7.9** |
| Residual | 1211 | 0.00038 | 0.00040 | 0.000070 | 0.000085 | 0.51 | 0.36 |

*, ** and NS indicate significant differences at p≤ 0.05, p≤ 0.01 and non-significant (p≥ 0.05), respectively. FRW (fresh root weight), FSW (fresh shoot weight), DRW (dry root weight), DSW (dry shoot weight), RL (root length) and SL (shoot length)

**Table S2. Mean square of absolute values for various germination traits of 20 rice genotypes grown in control and osmotic stress**

| **Source of variation** | **DF** | **IR 24 h** | **IR 48 h** | **SG** | **Ra L** | **Pl L** | **TFW** | **TDW** | **Proline** | **TAC** | **MDA** |
| --- | --- | --- | --- | --- | --- | --- | --- | --- | --- | --- | --- |
| Genotypes | 19 | 11022** | 24649** | 4.9** | 0.073** | 0.020** | 0.000081** | 0.0000028** | 36** | 0.033** | 0.20** |
| Treatment | 1 | 72994** | 254601** | 74** | 0.90** | 0.21** | 0.0099** | 0.00055** | 1165** | 0.50** | 1.6** |
| Genotypes × Treatment | 19 | 1626** | 4438** | 1.1** | 0.013** | 0.011** | 0.000014** | 0.00000060** | 27** | 0.0069** | 0.044** |
| Error | 80 | 65 | 72 | 0.0036 | 0.0093 | 0.0059 | 0.00000059 | 0.00000012 | 0.13 | 0.000050 | 0.00022 |

*, ** and NS indicate significant differences at p≤ 0.05, p≤ 0.01 and non-significant (p≥ 0.05), respectively. IR 24 h (imbibition rate after 24 h), IR 48 h (Imbibition rate after 48 h), SG (Speed of germination), Ra L (radical length), Pl L (plumule length), TFW (Total fresh weight of radical and plumule) and TDW (Total dry weight of radical and plumule). TCA = total antioxidant capacity and MDA = malondialdehyde

**Table S3. Mean square of absolute values for various seedling traits of 20 rice genotypes grown in control and drought stress**

| Source of variation | DF | FRW | FSW | DRW | DSW | RL | SL |
| --- | --- | --- | --- | --- | --- | --- | --- |
| Genotype | 19 | 0.16** | 0.38** | 0.022** | 0.014** | 616** | 240** |
| Treatment | 1 | 22** | 69** | 0.31** | 1.3** | 141** | 2548** |
| Genotype × Treatment | 19 | 0.024** | 0.22** | 0.00027** | 0.0060** | 55** | 13** |
| Error | 80 | 0.00040 | 0.0021 | 0.000020 | 0.00046 | 0.56 | 0.94 |

*, ** and NS indicates significant differences at p≤ 0.05, p≤ 0.01 and non-significant (p≥ 0.05), respectively. FRW (fresh root weight), FSW (fresh shoot weight), DRW (dry root weight), DSW (dry shoot weight), RL (root length), SL (shoot length)

**Table S4. Mean square of absolute values for various maturity traits of 20 rice genotypes grown in control and drought stress**

| Source of variation | d.f. | PTB | FF | SF | 100 GW | Ti |
| --- | --- | --- | --- | --- | --- | --- |
| Genotypes | 19 | 1551** | 4795** | 1589** | 1.3** | 241** |
| Treatments | 1 | 8402** | 52173** | 10080** | 9.8** | 1163** |
| Genotypes × Treatments | 19 | 141** | 909** | 266** | 0.13** | 29** |
| Residual | 40 | 2.7 | 12 | 18 | 0.00075 | 1.7 |

*, ** and NS indicate significant differences at p≤ 0.05, p≤ 0.01 and non-significant (p≥ 0.05), respectively. PTB (Plant total biomass), FF (fertile florets), SF (sterile florets), 100-GW (100 grain weight) and Ti (Number of tillers)

**Table S5**. **Forward and reverse primers of the genes under study**

| **Gene Name** | **Gene ID** | **Forward primer** | **Reverse primer** |
| --- | --- | --- | --- |
| *OsP5CS* | >Os05t0455500-01 | TTGTGCCGCTGTTGGTCAGA | AGTGAGTTGCTCCCGGAACTT |
| *UBQ* | >Os01t0125900-01 | ATGGAACTGCCAGTGATGGT | AGCCGAGTCACAAAGCCAAA |


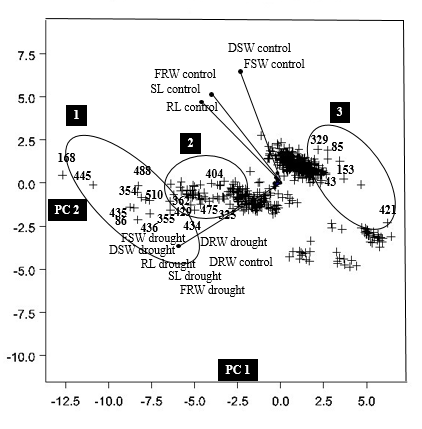


Fig. S1

**
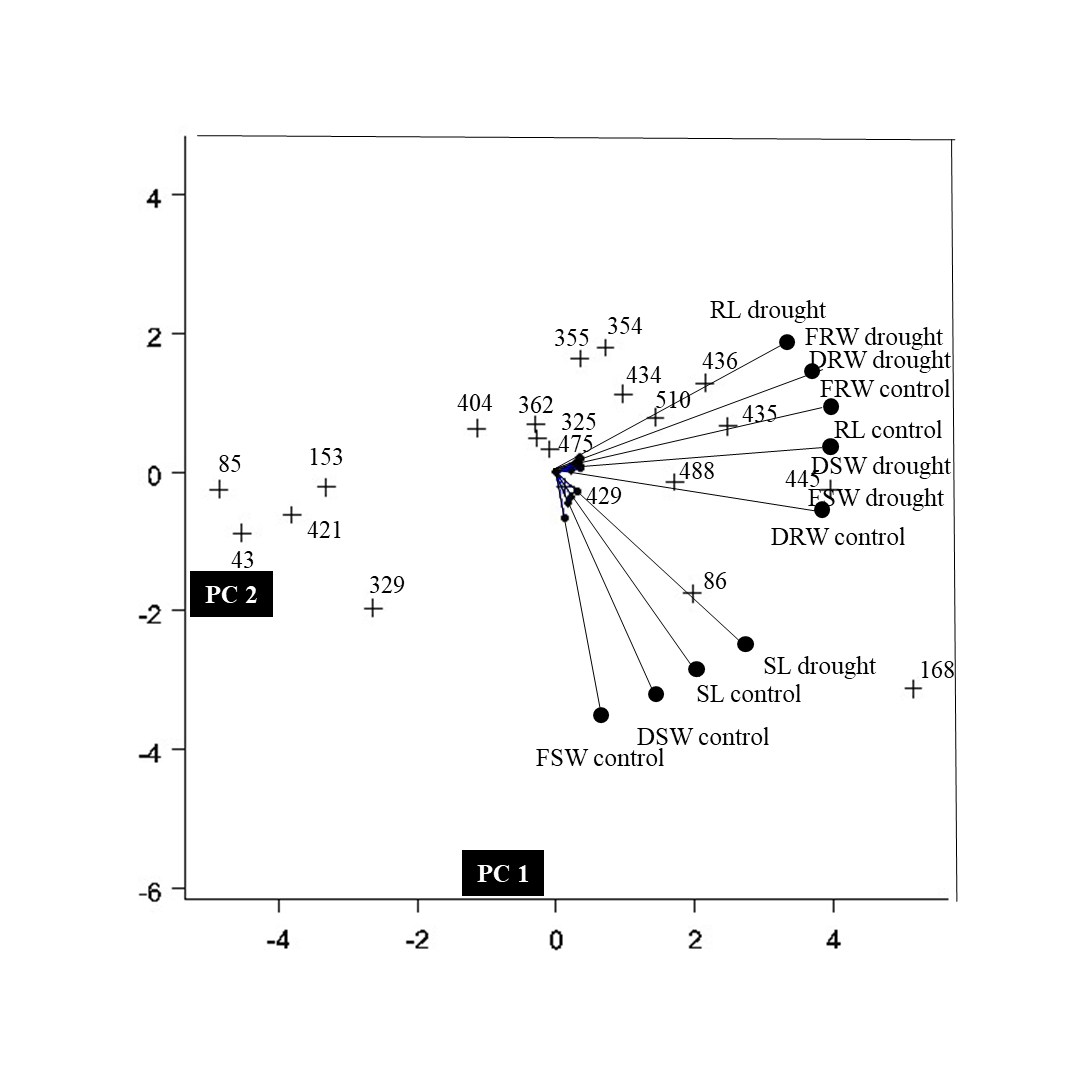
**

Fig. S2a

**
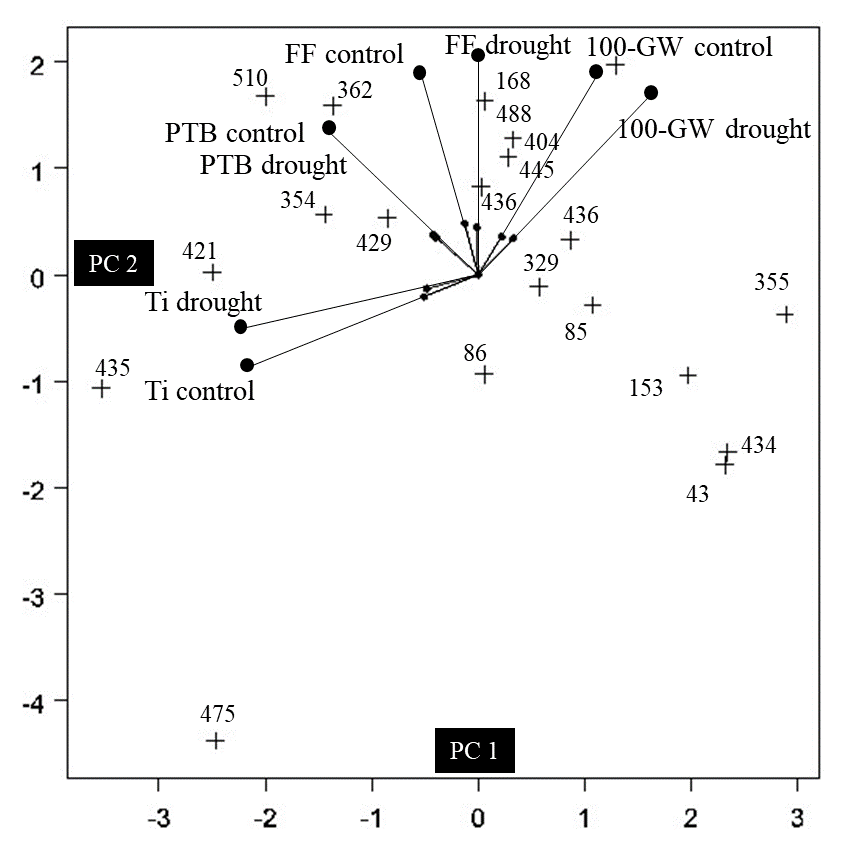
**

Fig. S2b

**Figure S1.** Biplots for the screening of rice germplasm

Biplot is showing the gain in root length (RL), shoot length (SL), fresh root weight (FRW), fresh shoot weight (FSW), dry root weight (DRW) and dry shoot weight (DSW) under control and drought environments.

**Figure S2**

(a) Biplot for the genotypic evaluation at seedling stage. It is showing the relationship between genotypes and traits including RL (root length), SL (shoot length), FRW (fresh root weight), FSW (fresh shoot weight), DRW (dry root weight) and DSW (dry shoot weight) under control and drought stress. (b) Biplot for the genotypic evaluation at maturity stage. It is showing the relationship between genotypes and traits including fertile florets (FF), the number of tillers (Ti), plant total biomass (PTB) and 100-grain weight (100-GW) under control and drought stress.
